# Supplementary material
Source: Springer Nature journal article supplement (https://www.springermedizin.de/resource/supplementary/13256_2011_1884_MOESM4_ESM.pdf/9648674)

**HE**

**CEA**

**AFP**

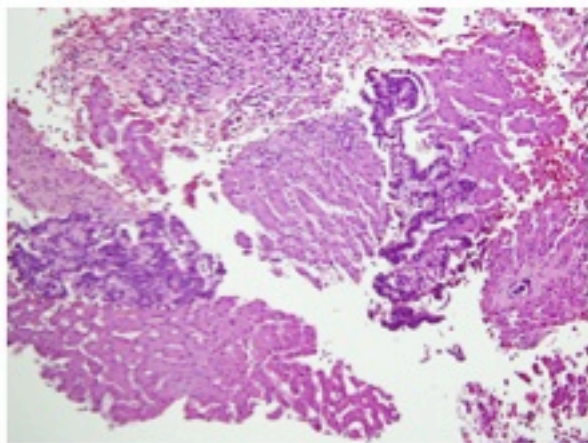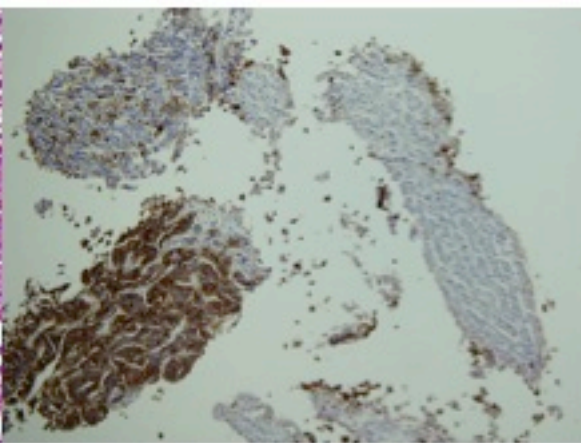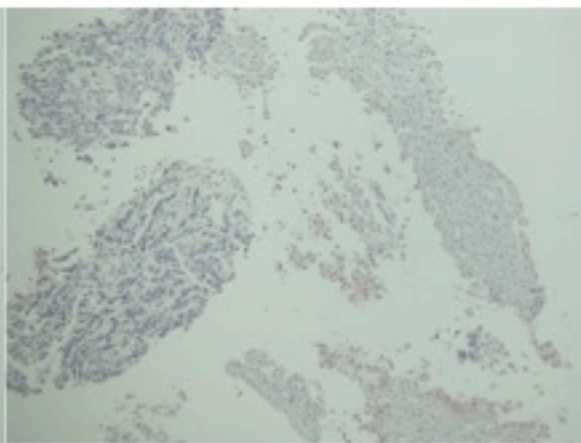

**A**

**B**

**C**

Supplement: MOESM4 [file 9648674]
